# Supplementary material
Source: PubMed Central journal article supplement (PMC3387987)

Supplemental Figure 1. Risk Stratification within Protocol Treatment Subset (Model Dataset)

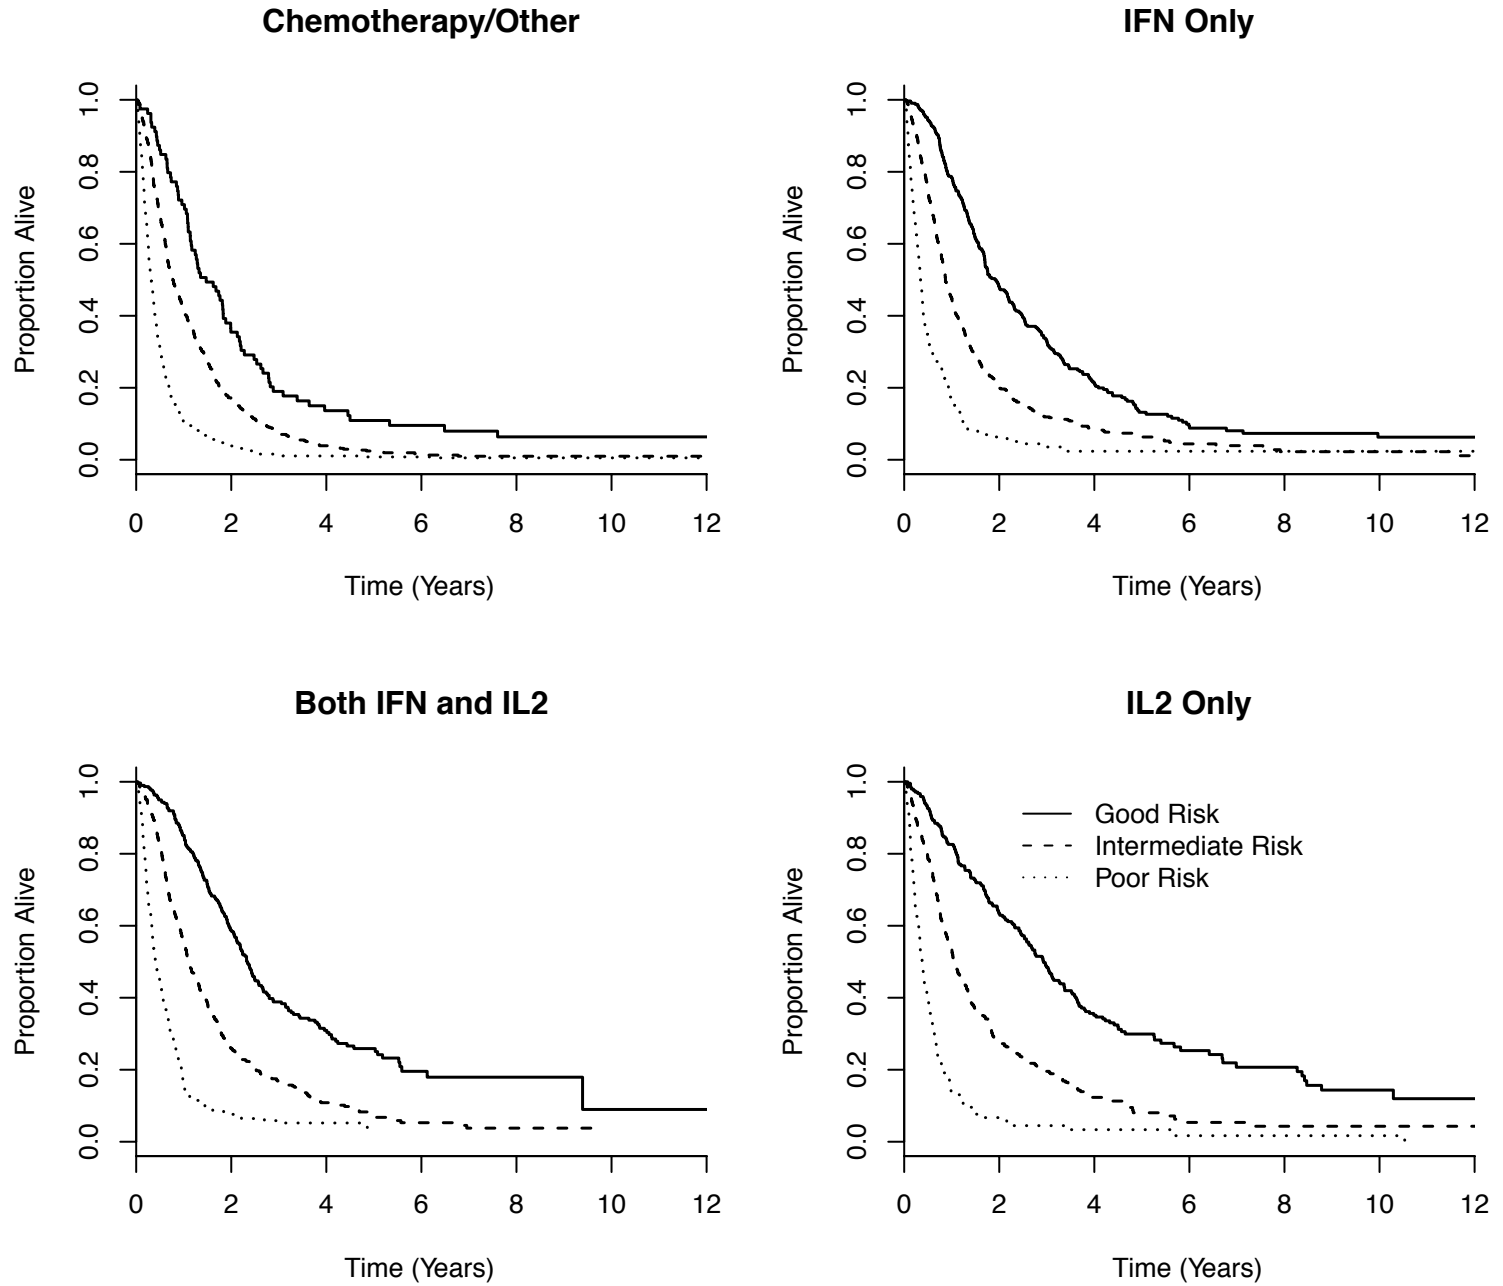

Supplement: NIHMS309206-supplement-2.pdf [file NIHMS309206-supplement-2.pdf]

Supplemental Figure 2. Risk Stratification within TKI Treatment Subset (Validation Dataset)

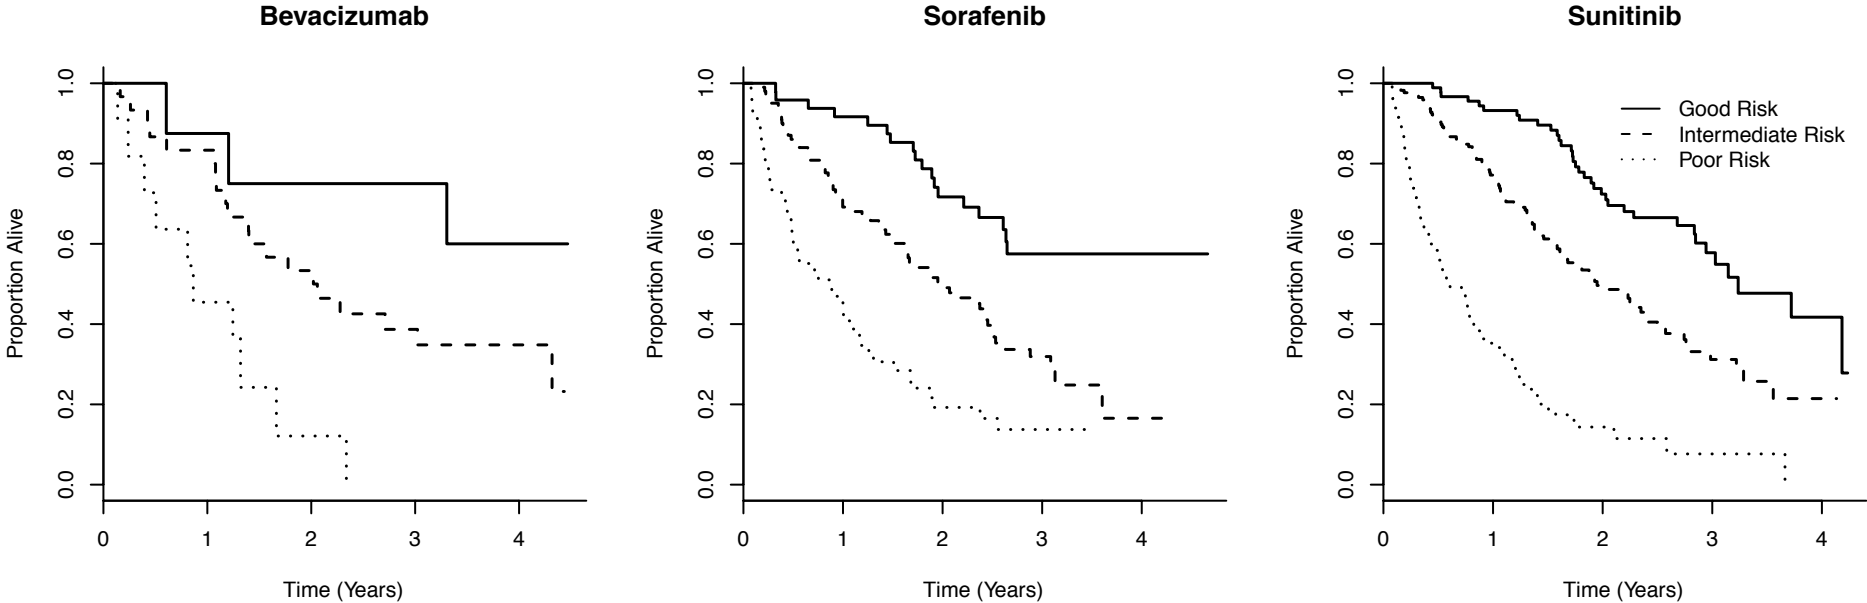

Supplement: NIHMS309206-supplement-3.pdf [file NIHMS309206-supplement-3.pdf]
